# Supplementary material
Source: PubMed Central journal article supplement (PMC1681491)
Supplement: msb4100059-s1.pdf [file msb4100059-s1.pdf]

## **SUPPLEMENTAL MATERIAL**

### **“Core transcriptional regulatory circuitry of human hepatocytes”**

Odom D.T. *et al. Mol. Systems Biol.* (2006) submission

#### **List of Supplemental Figures**

- Figure S1.** Liver master regulators bind to the promoters of the HNF4 $\alpha$  and TTR genes
- Figure S2.** Binding sequences in Odom et al. 2006 and Rada-Iglesias et al. 2005.
- Figure S3.** Combinatorial occupancy of promoter regions is significantly enriched
- Figure S4.** Correspondence of gene expression and location data

#### **List of Supplemental Tables**

- Table S1.** Hepatocyte master regulators profiled
- Table S2.** Regulatory network motifs in human liver
- Table S3.** *S. cerevisiae* transcription factors with auto-regulatory loops
- Table S4.** Auto-regulation occurrence among yeast transcriptional regulators sorted into groups of regulators, based on number of genes bound
- Table S5.** Mammalian transcription factors reported to directly auto-regulate
- Table S6.** Mammalian transcription factors that do not directly auto-regulate
- Table S7.** Tissues, antisera, and array platforms used for ChIP experiments in Rada-Iglesias et al. 2005 and Odom et al. 2006
- Table S8.** Binding event overlap between Rada-Iglesias et al. 2005 and Odom et al. 2006.
- Table S9.** Statistical significance of sequence motifs for the six liver master regulators.

#### **List of Supplemental Sections**

- ***Auto-regulation among *Saccharomyces cerevisiae* master regulators***
- ***Comparison between Rada-Iglesias ENCODE data and Odom promoter data***
- ***Materials and methods***

---

#### **Website**

Further experimental details are available on the authors' website at  
<http://web.wi.mit.edu/young/autoregulation/>

#### **Data Accession Number**

Complete, unprocessed data from these experiments have been deposited into the public database ArrayExpress (<http://www.ebi.ac.uk/arrayexpress/>): accession: **E-WMIT-9**

**Figure S1A.** The HNF4 $\alpha$  gene has an enhancer located 6 kb upstream from the P1 transcriptional start site (Bailey et al. 2001). HNF1 $\alpha$  and HNF4 $\alpha$  ChIP enrichment is shown as a trace relative to genomic position (graphic below). The known HNF binding sites in the HNF4A P1 promoter are located within 1 kb of the TSS and in the enhancer region 6 kb from the transcriptional start site, and are shown as color shaded ovals along the genome track. Coverage of the promoter regions was typically one 60-mer for each 250 bases of sequence, and allowed identification of in vivo binding sites to within tens of bases of the binding site position.

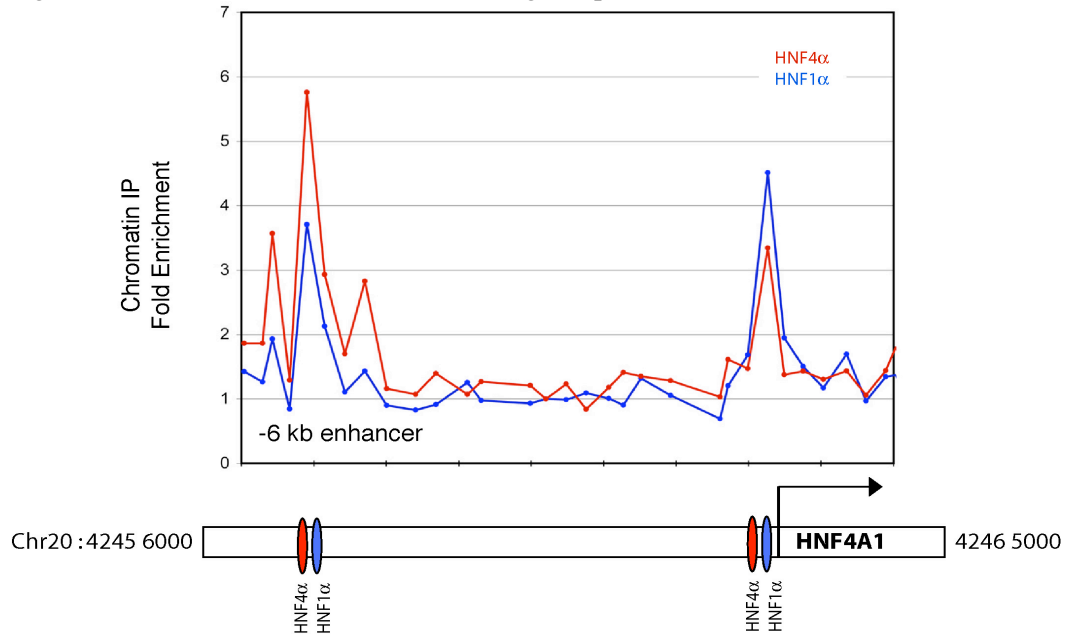

**Figure S1B.** The TTR gene is bound by a number of HNF factors in vivo at previously known sites within its immediate proximal promoter (reviewed in Costa et al. 2003). The known binding sites in the TTR promoter are located within 250 bp of the TSS, and are shown as color shaded ovals.

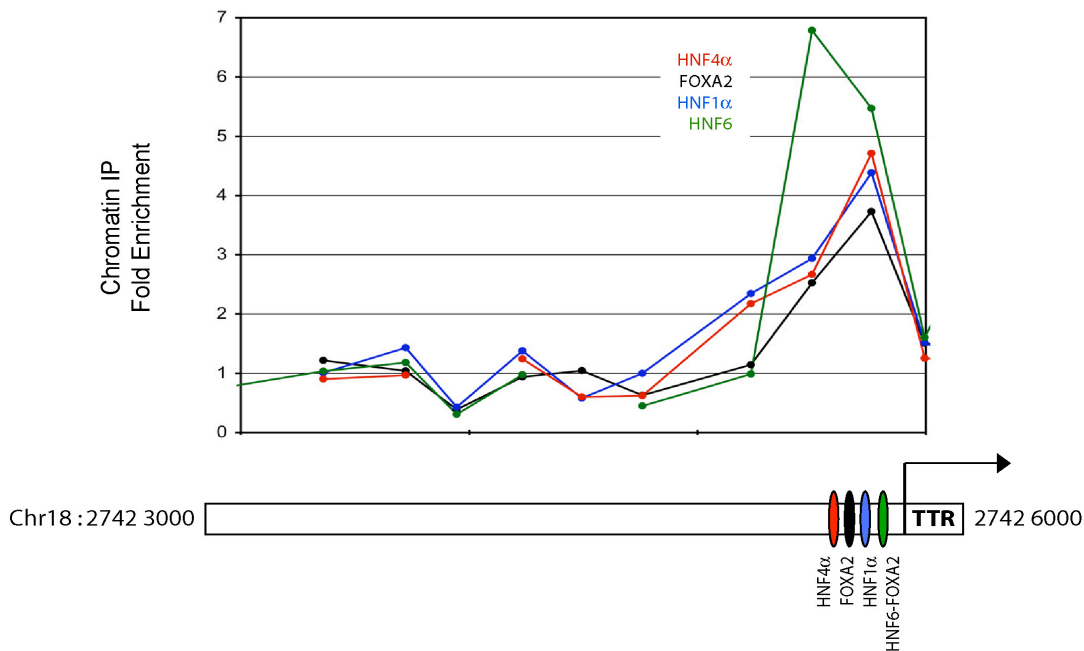

**Table S1.** Hepatocyte master regulators profiled in this study.\*

| Name          | Function                  | Antisera              | Gene Symbol | PFAM category    | Accession |
|---------------|---------------------------|-----------------------|-------------|------------------|-----------|
| HNF1 $\alpha$ | Metabolic control         | sc-6547 (Santa Cruz)  | TCF1        | POU-homeodomain  | NM_000545 |
| HNF4 $\alpha$ | Development, metabolism   | sc-8987 (Santa Cruz)  | NR2A1       | Nuclear receptor | NM_008261 |
| HNF6          | Development               | sc-13050 (Santa Cruz) | ONECUT1     | CUT-homeodomain  | NM_004498 |
| HNF3 $\beta$  | Development               | R. Costa              | FOXA2       | Forkhead         | NM_021784 |
| CREB1         | Nutrient response         | pCREB-5322 (Montminy) | CREB1       | bZIP             | NM_004379 |
| USF1          | Glucose, Lipid metabolism | AB/HLH230 (Cemines)   | USF1        | bHLH             | NM_007122 |

**\* References**

- Cereghini, S. (1996). Liver-enriched transcription factors and hepatocyte differentiation. *Faseb J* 10, 267-282.
- Hayashi, Y., Wang, W., Ninomiya, T., Nagano, H., Ohta, K., and Itoh, H. (1999). Liver enriched transcription factors and differentiation of hepatocellular carcinoma. *Mol Pathol* 52, 19-24.
- Zaret, K. S. (2002). Regulatory phases of early liver development: paradigms of organogenesis. *Nat Rev Genet* 3, 499-512.
- Costa, R. H., Kalinichenko, V. V., Holterman, A. X., and Wang, X. (2003). Transcription factors in liver development, differentiation, and regeneration. *Hepatology* 38, 1331-1347.
- Duncan, S. A., Navas, M. A., Dufort, D., Rossant, J., and Stoffel, M. (1998). Regulation of a transcription factor network required for differentiation and metabolism. *Science* 281, 692-695.
- Krivan, W., and Wasserman, W. W. (2001). A predictive model for regulatory sequences directing liver-specific transcription. *Genome Res* 11, 1559-1566.

**HNF1 $\alpha$** 

- Boj, S. F., Parrizas, M., Maestro, M. A., and Ferrer, J. (2001). A transcription factor regulatory circuit in differentiated pancreatic cells. *Proc Natl Acad Sci U S A* 98, 14481-14486.
- Hiraiwa, H., Pan, C. J., Lin, B., Akiyama, T. E., Gonzalez, F. J., and Chou, J. Y. (2001). A molecular link between the common phenotypes of type 1 glycogen storage disease and HNF1 $\alpha$ -null mice. *J Biol Chem* 276, 7963-7967.
- Pontoglio, M., Sreenan, S., Roe, M., Pugh, W., Ostrega, D., Doyen, A., Pick, A. J., Baldwin, A., Velho, G., Froguel, P., et al. (1998). Defective insulin secretion in hepatocyte nuclear factor 1 $\alpha$ -deficient mice. *J Clin Invest* 101, 2215-2222.
- Shih, D. Q., Bussen, M., Sehayek, E., Ananthanarayanan, M., Shneider, B. L., Suchy, F. J., Shefer, S., Bollileni, J. S., Gonzalez, F. J., Breslow, J. L., and Stoffel, M. (2001). Hepatocyte nuclear factor-1 $\alpha$  is an essential regulator of bile acid and plasma cholesterol metabolism. *Nat Genet* 27, 375-382.

**HNF4 $\alpha$** 

- Bailly, A., Torres-Padilla, M. E., Tinel, A. P., and Weiss, M. C. (2001). An enhancer element 6 kb upstream of the mouse HNF4 $\alpha$ 1 promoter is activated by glucocorticoids and liver-enriched transcription factors. *Nucleic Acids Res* 29, 3495-3505.
- Hayhurst, G. P., Lee, Y. H., Lambert, G., Ward, J. M., and Gonzalez, F. J. (2001). Hepatocyte nuclear factor 4 $\alpha$  (nuclear receptor 2A1) is essential for maintenance of hepatic gene expression and lipid homeostasis. *Mol Cell Biol* 21, 1393-1403.
- Gupta, R. K., and Kaestner, K. H. (2004). HNF-4 $\alpha$ : from MODY to late-onset type 2 diabetes. *Trends Mol Med* 10, 521-524.
- Gupta, R. K., Vatamaniuk, M. Z., Lee, C. S., Flaschen, R. C., Fulmer, J. T., Matschinsky, F. M., Duncan, S. A., and Kaestner, K. H. (2005). The MODY1 gene HNF-4 $\alpha$  regulates selected genes involved in insulin secretion. *J Clin Invest* 115, 1006-1015.

- Lee, Y. H., Sauer, B., and Gonzalez, F. J. (1998). Laron dwarfism and non-insulin-dependent diabetes mellitus in the Hnf-1alpha knockout mouse. *Mol Cell Biol* 18, 3059-3068.
- Parviz, F., Matullo, C., Garrison, W. D., Savatski, L., Adamson, J. W., Ning, G., Kaestner, K. H., Rossi, J. M., Zaret, K. S., and Duncan, S. A. (2003). Hepatocyte nuclear factor 4alpha controls the development of a hepatic epithelium and liver morphogenesis. *Nat Genet* 34, 292-296.

### **HNF6**

- Jacquemin, P., Lemaigre, F. P., and Rousseau, G. G. (2003). The Onecut transcription factor HNF-6 (OC-1) is required for timely specification of the pancreas and acts upstream of Pdx-1 in the specification cascade. *Dev Biol* 258, 105-116.
- Lemaigre, F. P., Durviaux, S. M., Truong, O., Lannoy, V. J., Hsuan, J. J., and Rousseau, G. G. (1996). Hepatocyte nuclear factor 6, a transcription factor that contains a novel type of homeodomain and a single cut domain. *Proc Natl Acad Sci U S A* 93, 9460-9464.
- Rausa, F., Samadani, U., Ye, H., Lim, L., Fletcher, C. F., Jenkins, N. A., Copeland, N. G., and Costa, R. H. (1997). The cut-homeodomain transcriptional activator HNF-6 is coexpressed with its target gene HNF-3 beta in the developing murine liver and pancreas. *Dev Biol* 192, 228-246.
- Samadani, U., and Costa, R. H. (1996). The transcriptional activator hepatocyte nuclear factor 6 regulates liver gene expression. *Mol Cell Biol* 16, 6273-6284.

### **FOXA2/HNF3β**

- Rausa, F. M., Tan, Y., Zhou, H., Yoo, K. W., Stolz, D. B., Watkins, S. C., Franks, R. R., Unterman, T. G., and Costa, R. H. (2000). Elevated levels of hepatocyte nuclear factor 3beta in mouse hepatocytes influence expression of genes involved in bile acid and glucose homeostasis. *Mol Cell Biol* 20, 8264-8282.
- Wolfrum, C., Asilmaz, E., Luca, E., Friedman, J. M., and Stoffel, M. (2004). Foxa2 regulates lipid metabolism and ketogenesis in the liver during fasting and in diabetes. *Nature* 432, 1027-1032.
- Zhang, L., Rubins, N. E., Ahima, R. S., Greenbaum, L. E., and Kaestner, K. H. (2005). Foxa2 integrates the transcriptional response of the hepatocyte to fasting. *Cell Metab* 2, 141-148.

### **CREB1**

- Montminy, M., Koo, S. H., and Zhang, X. (2004). The CREB family: key regulators of hepatic metabolism. *Ann Endocrinol (Paris)* 65, 73-75.
- Sharma, C., Pradeep, A., Pestell, R. G., and Rana, B. (2004). Peroxisome proliferator-activated receptor gamma activation modulates cyclin D1 transcription via beta-catenin-independent and cAMP-response element-binding protein-dependent pathways in mouse hepatocytes. *J Biol Chem* 279, 16927-16938.
- Koo, S.H., Flechner, L., Qi, L., Zhang, X., Screaton, R.A., Jeffries, S., Hedrick, S., Xu, W., Boussouar, F., Brindle, P., Takemori, H. and Montminy, M. (2005) The CREB coactivator TORC2 is a key regulator of fasting glucose metabolism. *Nature*, 437, 1109-1111.

### **USF1**

- Casado, M., Vallet, V. S., Kahn, A., and Vaulont, S. (1999). Essential role in vivo of upstream stimulatory factors for a normal dietary response of the fatty acid synthase gene in the liver. *J Biol Chem* 274, 2009-2013.
- Iyenedjian, P. B. (1998). Identification of upstream stimulatory factor as transcriptional activator of the liver promoter of the glucokinase gene. *Biochem J* 333 ( Pt 3), 705-712.
- Pajukanta, P., Lilja, H. E., Sinsheimer, J. S., Cantor, R. M., Lusic, A. J., Gentile, M., Duan, X. J., Soro-Paavonen, A., Naukkarinen, J., Saarela, J., et al. (2004). Familial combined hyperlipidemia is associated with upstream transcription factor 1 (USF1). *Nat Genet* 36, 371-376.
- Ribeiro, A., Pastier, D., Kardassis, D., Chambaz, J., and Cardot, P. (1999). Cooperative binding of upstream stimulatory factor and hepatic nuclear factor 4 drives the transcription of the human apolipoprotein A-II gene. *J Biol Chem* 274, 1216-1225.
- Vallet, V. S., Casado, M., Henrion, A. A., Bucchini, D., Raymondjean, M., Kahn, A., and Vaulont, S. (1998). Differential roles of upstream stimulatory factors 1 and 2 in the transcriptional response of liver genes to glucose. *J Biol Chem* 273, 20175-20179.

**Table S2.** Regulatory network motifs in human liver, determined as described in Materials and methods.

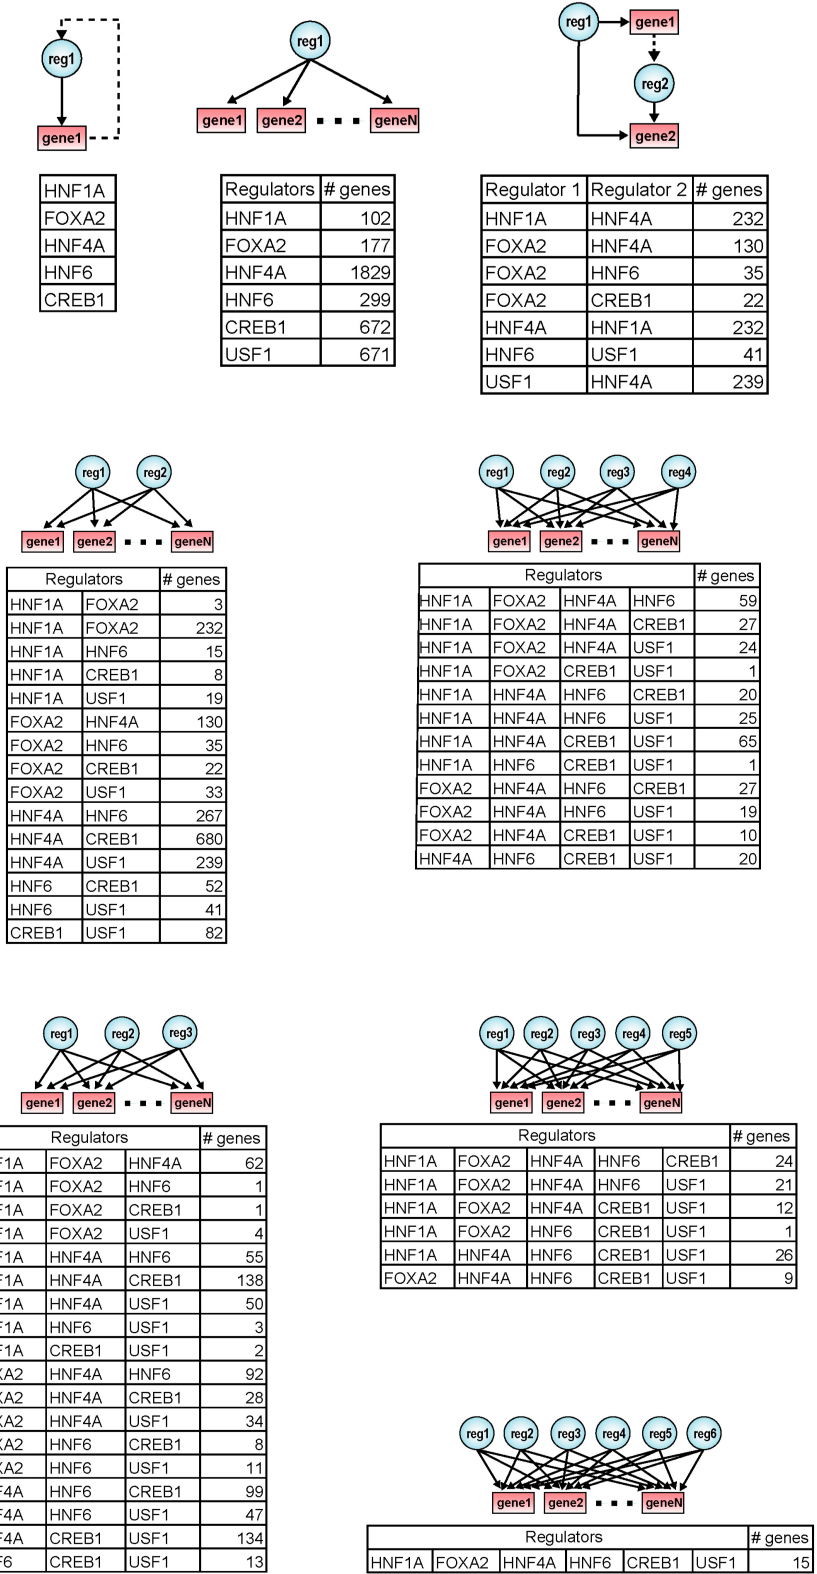

**Table S3.** *S. cerevisiae* transcription factors with auto-regulatory loops in rich media\*

| Regulator | Process                        |
|-----------|--------------------------------|
| STB5      | Multidrug resistance           |
| SWI4      | Cell cycle                     |
| STE12     | Mating                         |
| SUM1      | Sporulation                    |
| TEC1      | Pseudohyphal growth            |
| PDR3      | Multidrug resistance           |
| RCS1      | Iron homeostasis               |
| RDS1      | Multidrug resistance           |
| ROX1      | An/aerobic growth              |
| SMP1      | Osmotic stress                 |
| SUT1      | Hypoxia response               |
| YAP6      | Salt tolerance                 |
| YAP7      | Stress response                |
| ZAP1      | Heavy metal exposure           |
| ARG81     | Arginine metabolism            |
| ARO80     | Aromatic amino acid regulation |
| CBF1      | Centromere stability           |
| HAP1      | Aerobic respiration            |
| NRG1      | Glucose regulation             |
| RAP1      | Protein biosynthesis           |
| INO2      | Phospholipid biosynthesis      |
| IME1      | Meiosis                        |

**Table S4.** Auto-regulation occurrence among yeast transcriptional regulators sorted into groups of regulators based on number of genes bound.

| Minimum out-degree | Cumul. Observed | Cumul. Expected | p-value | Group size |
|--------------------|-----------------|-----------------|---------|------------|
| 60                 | 10              | 3.8             | 0.003   | 35         |
| 50                 | 11              | 4.3             | 0.003   | 40         |
| 40                 | 13              | 5.3             | 0.002   | 49         |
| 30                 | 14              | 6.9             | 0.007   | 64         |
| 20                 | 17              | 9.9             | 0.019   | 92         |
| 10                 | 19              | 13.5            | 0.079   | 125        |
| 0                  | 22              | 22              | 0.533   | 204        |

### *Auto-regulation among S. cerevisiae master regulators*

A master regulator is a transcription factor that controls cellular processes using a combination of direct and indirect means. We used the yeast *S. cerevisiae* as a model to explore the correlation between the presence of auto-regulation and identification of a transcription factor as a master regulator. This comparison was made possible because a complete set of binding interactions is available for all known and suspected transcriptional regulators. We analyzed the two cases of direct and indirect regulation separately, though both mechanisms can be present in varying degrees. We reasoned that in order to directly control a cellular process, which can include scores of genes, master regulators as a class would be expected to bind a disproportionately large fraction of yeast promoter regions. In contrast, if a master regulator were controlling a cellular process through intermediary transcription factors, and was present at the top of a hierarchy of factors, we would expect to observe the master regulator binding to a disproportionate number of promoter regions of other transcription factors, which would then act downstream. We used these definitions to test whether auto-regulatory loops were correlated with master regulators of yeast cellular functions.

First, we explored whether auto-regulation was found disproportionately among regulators that function indirectly. To identify these master regulators based on the number of downstream transcription factors, we ranked the 204 transcriptional factors by the number of

other transcription factors whose promoters they bind in vivo, and selected the top fifth. There are 39 transcription factors in this category, and they bind to the promoters of at least 3 and at most 13 transcriptional regulators (average= 5.0). This set of 39 captured 11 auto-regulatory events, for a p-value of  $4.9 \times 10^{-4}$ .

Second, we analyzed whether auto-regulation is more common among master regulators that function directly, by binding many genes. Using a variety of thresholds for the number of bound genes from ten to sixty, we found that auto-regulation is more common among the master regulators than would be expected (Table S4). For this calculation, we assumed a null hypothesis that the probability of auto-regulation was the same for all regulators ( $P=22/204$ ), and thus independent of the number of genes bound by the regulator (out-degree). We also tested an alternative null hypothesis in which the probability of auto-regulation was equal to the out-degree divided by the total number of bound genes. This calculation yielded similar results (not shown).

#### \* **References**

- Ashburner, B. P., and Lopes, J. M. (1995). Auto-regulated expression of the yeast INO2 and INO4 helix-loop-helix activator genes effects cooperative regulation on their target genes. *Mol Cell Biol* 15, 1709-1715.
- Delahodde, A., Delaveau, T., and Jacq, C. (1995). Positive auto-regulation of the yeast transcription factor Pdr3p, which is involved in control of drug resistance. *Mol Cell Biol* 15, 4043-4051.
- Shefer-Vaida, M., Sherman, A., Ashkenazi, T., Robzyk, K., and Kassir, Y. (1995). Positive and negative feedback loops affect the transcription of IME1, a positive regulator of meiosis in *Saccharomyces cerevisiae*. *Dev Genet* 16, 219-228.
- Ren, B., Robert, F., Wyrick, J. J., Aparicio, O., Jennings, E. G., Simon, I., Zeitlinger, J., Schreiber, J., Hannett, N., Kanin, E., et al. (2000). Genome-wide location and function of DNA binding proteins. *Science* 290, 2306-2309.
- Eiznhamer, D. A., Ashburner, B. P., Jackson, J. C., Gardenour, K. R., and Lopes, J. M. (2001). Expression of the INO2 regulatory gene of *Saccharomyces cerevisiae* is controlled by positive and negative promoter elements and an upstream open reading frame. *Mol Microbiol* 39, 1395-1405.
- Simon, I., Barnett, J., Hannett, N., Harbison, C. T., Rinaldi, N. J., Volkert, T. L., Wyrick, J. J., Zeitlinger, J., Gifford, D. K., Jaakkola, T. S., and Young, R. A. (2001). Serial regulation of transcriptional regulators in the yeast cell cycle. *Cell* 106, 697-708.
- Lee, T. I., Rinaldi, N. J., Robert, F., Odom, D. T., Bar-Joseph, Z., Gerber, G. K., Hannett, N. M., Harbison, C. T., Thompson, C. M., Simon, I., et al. (2002). Transcriptional regulatory networks in *Saccharomyces cerevisiae*. *Science* 298, 799-804.
- Zeitlinger, J., Simon, I., Harbison, C. T., Hannett, N. M., Volkert, T. L., Fink, G. R., and Young, R. A. (2003). Program-specific distribution of a transcription factor dependent on partner transcription factor and MAPK signaling. *Cell* 113, 395-404.
- Harbison, C. T., Gordon, D. B., Lee, T. I., Rinaldi, N. J., Macisaac, K. D., Danford, T. W., Hannett, N. M., Tagne, J. B., Reynolds, D. B., Yoo, J., et al. (2004). Transcriptional regulatory code of a eukaryotic genome. *Nature* 431, 99-104.

**Table S5.** Vertebrate transcriptional regulators with an auto-regulatory loop\*\*

| <b>Factor</b>   | <b>Symbol</b> | <b>First Author</b> | <b>Year</b> | <b>Species</b> | <b>Tissue</b>         |
|-----------------|---------------|---------------------|-------------|----------------|-----------------------|
| <b>cREL</b>     | REL           | Hannink             | 1990        | Chicken        |                       |
| <b>MYB</b>      | MYB           | Nicolaides          | 1991        | Hampster       | Fibroblasts           |
| <b>AR</b>       | AR            | Grad                | 1999        | Human          | Prostate              |
| <b>BCL6</b>     | BCL6          | Wang                | 2002        | Human          | B-cells               |
| <b>CEBPA</b>    | CEBPA         | Timchenko           | 1995        | Human          | Liver                 |
| <b>CEBPA</b>    | CEBPA         | Foka                | 2001        | Human          | Hepatoma              |
| <b>CEBPB</b>    | CEBPB         | Niehof              | 2001        | Human          | Hepatoma              |
| <b>c-jun</b>    | JUN           | Angel               | 1988        | Human          | Cell lines            |
| <b>c-jun</b>    | JUN           | Mechta              | 1994        | Human          | Review                |
| <b>C-MYC</b>    | MYC           | Martinotti          | 1988        | Human          | B-cells               |
| <b>C-MYC</b>    | MYC           | Kitaura             | 1991        | Human          | HeLa                  |
| <b>CREB</b>     | CREB1         | Meyer               | 1993        | Human          | Placental cells       |
| <b>E2F1</b>     | E2F1          | Neuman              | 1994        | Human          | Osteogenic Sarcoma    |
| <b>ER</b>       | ESR1          | Castles             | 1997        | Human          | HeLa                  |
| <b>ETS1</b>     | ETS1          | Jorcyk              | 1991        | Human          | HeLa                  |
| <b>ETS1</b>     | ETS1          | Oka                 | 1991        | Human          | Lymphocyte            |
| <b>ETS1</b>     | ETS1          | Majerus             | 1992        | Human          | T-cell                |
| <b>GATA3</b>    | GATA3         | Zhou                | 2003        | Human          | Th1/Th2               |
| <b>GFI1</b>     | GFI1          | Doan                | 2004        | Human          | Lymphocyte            |
| <b>junD</b>     | JUND          | Berger              | 1994        | Human          | HeLa                  |
| <b>junD</b>     | JUND          | Berger              | 1998        | Human          | HeLa                  |
| <b>LXRA</b>     | NR1H3         | Lafitte             | 2001        | Human          | Lymphocyte            |
| <b>LXRA</b>     | NR1H3         | Li                  | 2002        | Human          | Liver                 |
| <b>MITF-M</b>   | MITF          | Saito               | 2002        | Human          | HeLa                  |
| <b>NANOG</b>    | NANOG         | Boyer               | 2005        | Human          | Embryonic stem cells  |
| <b>N-Myc</b>    | MYCN          | Sivak               | 1997        | Human          | Neuroblastoma         |
| <b>p49/p100</b> | NFKB2         | Lombardi            | 1995        | Human          | HeLa                  |
| <b>p50</b>      | NFKB1         | Ten                 | 1992        | Human          | Cell lines            |
| <b>p50</b>      | NFKB1         | Cogswell            | 1993        | Human          | Cell lines            |
| <b>P53</b>      | TP53          | Hudson              | 1995        | Human          | Cell lines            |
| <b>P53</b>      | TP53          | Benoit              | 2000        | Human          | Adenocarcinoma        |
| <b>PAX6</b>     | PAX6          | Yamaguchi           | 1997        | Human          | Ocular                |
| <b>PU.1</b>     | SPI1          | Chen                | 1995        | Human          | Myeloid               |
| <b>PURA</b>     | PURA          | Muralidharan        | 2001        | Human          | Glial/other           |
| <b>RB1</b>      | RB1           | Ohtani-Fujita       | 1994        | Human          | Cell lines            |
| <b>RB1</b>      | RB1           | Shan                | 1994        | Human          | Osteogenic Sarcoma    |
| <b>RBL1</b>     | RBL1          | Zhu                 | 1995        | Human          | Embryonic Kidney      |
| <b>SOX2</b>     | SOX2          | Boyer               | 2005        | Human          | Embryonic stem cells  |
| <b>TTF1</b>     | TITF1         | Oguchi              | 1998        | Human          | Thyroid               |
| <b>KLF4</b>     | KLF4          | Mahatan             | 1999        | Monkey         | Kidney                |
| <b>BRN3A</b>    | POU4F1        | Trieu               | 2003        | Mouse          | Neurons               |
| <b>CDX1</b>     | CDX1          | Beland              | 2004        | Mouse          | Embryonic carcinoma   |
| <b>CDX2</b>     | CDX2          | Xu                  | 1999        | Mouse          | Pancreas              |
| <b>CEBPA</b>    | CEBPA         | Christy             | 1991        | Mouse          | Adipocytes            |
| <b>CEBPD</b>    | CEBPD         | Yamada              | 1999        | Mouse          |                       |
| <b>c-Fos</b>    | FOS           | Sassone-Corsi       | 1988        | Mouse          | Embryonic Fibroblasts |
| <b>c-Fos</b>    | FOS           | Konig               | 1989        | Mouse          | Embryonic Fibroblasts |
| <b>CRY1</b>     | CRY1          | Kume                | 1999        | Mouse          | Adipocytes            |
| <b>FOXA2</b>    | FOXA2         | Pani                | 1992        | Mouse          | Liver                 |
| <b>GSC</b>      | GSC           | Danilov             | 1998        | Mouse          | Embryonic carcinoma   |



**Table S5 (cont'd).** Vertebrate transcriptional regulators with an auto-regulatory loop\*\*

|                |         |                 |      |           |                                      |
|----------------|---------|-----------------|------|-----------|--------------------------------------|
| <b>HDAC1</b>   | HDAC1   | Schuettengruber | 2003 | Mouse     | Fibroblasts                          |
| <b>HES1</b>    | HES1    | Hirata          | 2002 | Mouse     | Myoblasts/Fibroblasts/Neuroblastoma/ |
| <b>HES7</b>    | HES7    | Bessho          | 2001 | Mouse     |                                      |
| <b>HNF4A</b>   | HNF4A   | Briancon        | 2004 | Mouse     | Liver                                |
| <b>LXRA</b>    | NR1H3   | Ulven           | 2004 | Mouse     | Adipose                              |
| <b>MYOD</b>    | MYOD    | Tapscott        | 1991 | Mouse     | Muscle                               |
| <b>MYOD</b>    | MYOD1   | Blais           | 2005 | Mouse     | Myoblast                             |
| <b>MYOD</b>    | MYOD1   | Thayer          | 1989 | Mouse     | Embryonic Fibroblasts                |
| <b>MYOG</b>    | MYOG1   | Blais           | 2005 | Mouse     | Myoblast                             |
| <b>OCT1</b>    | POU2F1  | Pankratova      | 2003 | Mouse     | Fibroblasts                          |
| <b>OCT4</b>    | POU5F1  | Okura-Nakanishi | 2005 | Mouse     | mES                                  |
| <b>P53</b>     | TP53    | Deffie          | 1993 | Mouse     | Embryonic Fibroblasts                |
| <b>PAX4</b>    | PAX4    | Smith           | 2000 | Mouse     | Beta-cell line                       |
| <b>PAX6</b>    | PAX6    | Aota            | 2003 | Mouse     | Ocular                               |
| <b>PIT1</b>    | POU1F1  | Chen            | 1990 | Mouse     | Epithelial                           |
| <b>PITX1</b>   | PITX1   | Goodyer         | 2003 | Mouse     | Stomodeum/Oral ectoderm              |
| <b>PU.1</b>    | SPI1    | Okuno           | 2005 | Mouse     | Bone Marrow                          |
| <b>RB1</b>     | RB1     | Hamel           | 1992 | Mouse     | Embryonic carcinoma                  |
| <b>RUNX2</b>   | RUNX2   | Drissi          | 2000 | Mouse     | Osteoblasts                          |
| <b>RUNX2</b>   | RUNX2   | Tou             | 2003 | Mouse     | Osteoblasts                          |
| <b>SOX2</b>    | SOX2    | Catena          | 2004 | Mouse     | mES                                  |
| <b>SRF</b>     | SRF     | Spencer         | 1996 | Mouse     | Embryonic Fibroblasts                |
| <b>STAT3</b>   | STAT3   | Narimatsu       | 2001 | Mouse     | T-cell                               |
| <b>STRA13</b>  | STRA13  | Sun             | 2000 | Mouse     | Embryonic Fibroblasts                |
| <b>TR</b>      | THRA    | Sadow           | 2003 | Mouse     | Liver/Heart                          |
| <b>EGR1</b>    | EGR1    | Saadane         | 2000 | Mouse     | Cardiocytes                          |
| <b>GATA2</b>   | GATA2   | Grass           | 2003 | Mouse     | Hematopoietic                        |
| <b>NKX2.5</b>  | NKX2-5  | Oka             | 1997 | Mouse     | Cardiocytes                          |
| <b>CEBPA</b>   | CEBPA   | Legraverend     | 1993 | Rat       | Liver                                |
| <b>CEBPD</b>   | CEBPD   | Tanabe          | 2000 | Rat       |                                      |
| <b>CREB</b>    | CREB1   | Walker          | 1995 | Rat       | Testicular/Sertoli                   |
| <b>CREM</b>    | CREM    | Molina          | 1993 | Rat       | Cell lines                           |
| <b>E2F2</b>    | E2F2    | Sears           | 1997 | Rat       | Embryonic Fibroblasts                |
| <b>FRA1</b>    | FOSL1   | Casalino        | 2003 | Rat       | Thyroid                              |
| <b>N-Myc</b>   | MYCN    | Facchini        | 1997 | Rat       | Fibroblasts                          |
| <b>PIT1</b>    | POU1F1  | Theill          | 1993 | Rat       | Pituitary                            |
| <b>xVENT2B</b> | xVENT2B | Henningfeld     | 2002 | Xenopus   | Embryos                              |
| <b>GATA1</b>   | GATA1   | Nishikawa       | 2003 | Zebrafish | Hematopoietic                        |
| <b>GATA1</b>   | GATA1   | Tsai            | 1991 | Mouse     | Hematopoietic                        |
| <b>GATA1</b>   | GATA1   | Orkin           | 1995 | Mouse     | Hematopoietic                        |

**\*\* References**

- Angel, P., Hattori, K., Smeal, T. and Karin, M. (1988) The jun proto-oncogene is positively auto-regulated by its product, Jun/AP-1. *Cell*, 55, 875-885.
- Aota, S., Nakajima, N., Sakamoto, R., Watanabe, S., Ibaraki, N. and Okazaki, K. (2003) Pax6 auto-regulation mediated by direct interaction of Pax6 protein with the head surface ectoderm-specific enhancer of the mouse Pax6 gene. *Dev Biol*, 257, 1-13.
- Beland, M., Pilon, N., Houle, M., Oh, K., Sylvestre, J.R., Prinos, P. and Lohnes, D. (2004) Cdx1 auto-regulation is governed by a novel Cdx1-LEF1 transcription complex. *Mol Cell Biol*, 24, 5028-5038.
- Benoit, V., Hellin, A.C., Huygen, S., Gielen, J., Bours, V. and Merville, M.P. (2000) Additive effect between NF-kappaB subunits and p53 protein for transcriptional activation of human p53 promoter. *Oncogene*, 19, 4787-4794.

- Berger, I. and Shaul, Y. (1994) The human junD gene is positively and selectively auto-regulated. *DNA Cell Biol*, 13, 249-255.
- Berger, I. and Shaul, Y. (1998) c-Fos antagonizes the junD gene positive auto-regulatory loop; a novel c-Fos role in promoter switching. *Gene*, 211, 375-382.
- Bessho, Y., Sakata, R., Komatsu, S., Shiota, K., Yamada, S. and Kageyama, R. (2001) Dynamic expression and essential functions of Hes7 in somite segmentation. *Genes Dev*, 15, 2642-2647.
- Blais, A., Tsikitis, M., Acosta-Alvear, D., Sharan, R., Kluger, Y. and Dynlacht, B.D. (2005) An initial blueprint for myogenic differentiation. *Genes Dev*, 19, 553-569.
- Boyer, L.A., Lee, T.I., Cole, M.F., Johnstone, S.E., Levine, S.S., Zucker, J.P., Guenther, M.G., Kumar, R.M., Murray, H.L., Jenner, R.G., Gifford, D.K., Melton, D.A., Jaenisch, R. and Young, R.A. (2005) Core transcriptional regulatory circuitry in human embryonic stem cells. *Cell*, 122, 947-956.
- Briancon, N., Bailly, A., Clotman, F., Jacquemin, P., Lemaigre, F.P. and Weiss, M.C. (2004) Expression of the alpha7 isoform of hepatocyte nuclear factor (HNF) 4 is activated by HNF6/OC-2 and HNF1 and repressed by HNF4alpha1 in the liver. *J Biol Chem*, 279, 33398-33408.
- Casalino, L., De Cesare, D. and Verde, P. (2003) Accumulation of Fra-1 in ras-transformed cells depends on both transcriptional auto-regulation and MEK-dependent posttranslational stabilization. *Mol Cell Biol*, 23, 4401-4415.
- Castles, C.G., Oesterreich, S., Hansen, R. and Fuqua, S.A. (1997) Auto-regulation of the estrogen receptor promoter. *J Steroid Biochem Mol Biol*, 62, 155-163.
- Catena, R., Tiveron, C., Ronchi, A., Porta, S., Ferri, A., Tatangelo, L., Cavallaro, M., Favaro, R., Ottolenghi, S., Reinbold, R., Scholer, H. and Nicolis, S.K. (2004) Conserved POU binding DNA sites in the Sox2 upstream enhancer regulate gene expression in embryonic and neural stem cells. *J Biol Chem*, 279, 41846-41857.
- Chen, R.P., Ingraham, H.A., Treacy, M.N., Albert, V.R., Wilson, L. and Rosenfeld, M.G. (1990) Auto-regulation of pit-1 gene expression mediated by two cis-active promoter elements. *Nature*, 346, 583-586.
- Christy, R.J., Kaestner, K.H., Geiman, D.E. and Lane, M.D. (1991) CCAAT/enhancer binding protein gene promoter: binding of nuclear factors during differentiation of 3T3-L1 preadipocytes. *Proc Natl Acad Sci U S A*, 88, 2593-2597.
- Cogswell, P.C., Scheinman, R.I. and Baldwin, A.S., Jr. (1993) Promoter of the human NF-kappa B p50/p105 gene. Regulation by NF-kappa B subunits and by c-REL. *J Immunol*, 150, 2794-2804.
- Cripps, R.M., Lovato, T.L. and Olson, E.N. (2004) Positive auto-regulation of the Myocyte enhancer factor-2 myogenic control gene during somatic muscle development in *Drosophila*. *Dev Biol*, 267, 536-547.
- Danilov, V., Blum, M., Schweickert, A., Campione, M. and Steinbeisser, H. (1998) Negative auto-regulation of the organizer-specific homeobox gene goosecoid. *J Biol Chem*, 273, 627-635.
- Deffie, A., Wu, H., Reinke, V. and Lozano, G. (1993) The tumor suppressor p53 regulates its own transcription. *Mol Cell Biol*, 13, 3415-3423.
- Doan, L.L., Porter, S.D., Duan, Z., Flubacher, M.M., Montoya, D., Tschlis, P.N., Horwitz, M., Gilks, C.B. and Grimes, H.L. (2004) Targeted transcriptional repression of Gfi1 by GFI1 and GFI1B in lymphoid cells. *Nucleic Acids Res*, 32, 2508-2519.
- Drissi, H., Luc, Q., Shakoori, R., Chua De Sousa Lopes, S., Choi, J.Y., Terry, A., Hu, M., Jones, S., Neil, J.C., Lian, J.B., Stein, J.L., Van Wijnen, A.J. and Stein, G.S. (2000) Transcriptional auto-regulation of the bone related CBFA1/RUNX2 gene. *J Cell Physiol*, 184, 341-350.
- Facchini, L.M., Chen, S., Marhin, W.W., Lear, J.N. and Penn, L.Z. (1997) The Myc negative auto-regulation mechanism requires Myc-Max association and involves the c-myc P2 minimal promoter. *Mol Cell Biol*, 17, 100-114.
- Fitch, M.J., Donato, J.J. and Tye, B.K. (2003) Mcm7, a subunit of the presumptive MCM helicase, modulates its own expression in conjunction with Mcm1. *J Biol Chem*, 278, 25408-25416.
- Foka, P., Kousteni, S. and Ramji, D.P. (2001) Molecular characterization of the *Xenopus* CCAAT-enhancer binding protein beta gene promoter. *Biochem Biophys Res Commun*, 285, 430-436.
- Goodyer, C.G., Tremblay, J.J., Paradis, F.W., Marcil, A., Lanctot, C., Gauthier, Y. and Drouin, J. (2003) Pitx1 in vivo promoter activity and mechanisms of positive auto-regulation. *Neuroendocrinology*, 78, 129-137.
- Grad, J.M., Dai, J.L., Wu, S. and Burnstein, K.L. (1999) Multiple androgen response elements and a Myc consensus site in the androgen receptor (AR) coding region are involved in androgen-mediated up-regulation of AR messenger RNA. *Mol Endocrinol*, 13, 1896-1911.

- Grass, J.A., Boyer, M.E., Pal, S., Wu, J., Weiss, M.J. and Bresnick, E.H. (2003) GATA-1-dependent transcriptional repression of GATA-2 via disruption of positive auto-regulation and domain-wide chromatin remodeling. *Proc Natl Acad Sci U S A*, 100, 8811-8816.
- Hamel, P.A., Gill, R.M., Phillips, R.A. and Gallie, B.L. (1992) Transcriptional repression of the E2-containing promoters E1aE, c-myc, and RB1 by the product of the RB1 gene. *Mol Cell Biol*, 12, 3431-3438.
- Hannink, M. and Temin, H.M. (1990) Structure and auto-regulation of the c-rel promoter. *Oncogene*, 5, 1843-1850.
- Hatzis, P. and Talianidis, I. (2001) Regulatory mechanisms controlling human hepatocyte nuclear factor 4alpha gene expression. *Mol Cell Biol*, 21, 7320-7330.
- Henningfeld, K.A., Friedle, H., Rastegar, S. and Knochel, W. (2002) Auto-regulation of Xvent-2B; direct interaction and functional cooperation of Xvent-2 and Smad1. *J Biol Chem*, 277, 2097-2103.
- Hirata, H., Yoshiura, S., Ohtsuka, T., Bessho, Y., Harada, T., Yoshikawa, K. and Kageyama, R. (2002) Oscillatory expression of the bHLH factor Hes1 regulated by a negative feedback loop. *Science*, 298, 840-843.
- Hudson, J.M., Frade, R. and Bar-Eli, M. (1995) Wild-type p53 regulates its own transcription in a cell-type specific manner. *DNA Cell Biol*, 14, 759-766.
- Ingraham, H.A., Chen, R.P., Mangalam, H.J., Elsholtz, H.P., Flynn, S.E., Lin, C.R., Simmons, D.M., Swanson, L. and Rosenfeld, M.G. (1988) A tissue-specific transcription factor containing a homeodomain specifies a pituitary phenotype. *Cell*, 55, 519-529.
- Jeong, J.H., Orvis, J., Kim, J.W., McMurtrey, C.P., Renne, R. and Dittmer, D.P. (2004) Regulation and auto-regulation of the promoter for the latency-associated nuclear antigen of Kaposi's sarcoma-associated herpesvirus. *J Biol Chem*, 279, 16822-16831.
- Joreyk, C.L., Watson, D.K., Mavrothalassitis, G.J. and Papas, T.S. (1991) The human ETS1 gene: genomic structure, promoter characterization and alternative splicing. *Oncogene*, 6, 523-532.
- Kitaura, H., Galli, I., Taira, T., Iguchi-Arigo, S.M. and Ariga, H. (1991) Activation of c-myc promoter by c-myc protein in serum starved cells. *FEBS Lett*, 290, 147-152.
- Konig, H., Ponta, H., Rahmsdorf, U., Buscher, M., Schonthal, A., Rahmsdorf, H.J. and Herrlich, P. (1989) Auto-regulation of fos: the dyad symmetry element as the major target of repression. *Embo J*, 8, 2559-2566.
- Kume, K., Zylka, M.J., Sriram, S., Shearman, L.P., Weaver, D.R., Jin, X., Maywood, E.S., Hastings, M.H. and Reppert, S.M. (1999) mCRY1 and mCRY2 are essential components of the negative limb of the circadian clock feedback loop. *Cell*, 98, 193-205.
- Laffitte, B.A., Joseph, S.B., Walczak, R., Pei, L., Wilpitz, D.C., Collins, J.L. and Tontonoz, P. (2001) Auto-regulation of the human liver X receptor alpha promoter. *Mol Cell Biol*, 21, 7558-7568.
- Legraverend, C., Antonson, P., Flodby, P. and Xanthopoulos, K.G. (1993) High level activity of the mouse CCAAT/enhancer binding protein (C/EBP alpha) gene promoter involves auto-regulation and several ubiquitous transcription factors. *Nucleic Acids Res*, 21, 1735-1742.
- Li, Y., Bolten, C., Bhat, B.G., Woodring-Dietz, J., Li, S., Prayaga, S.K., Xia, C. and Lala, D.S. (2002) Induction of human liver X receptor alpha gene expression via an auto-regulatory loop mechanism. *Mol Endocrinol*, 16, 506-514.
- Lombardi, L., Ciana, P., Cappellini, C., Trecca, D., Guerrini, L., Migliazza, A., Maiolo, A.T. and Neri, A. (1995) Structural and functional characterization of the promoter regions of the NFKB2 gene. *Nucleic Acids Res*, 23, 2328-2336.
- Mahatan, C.S., Kaestner, K.H., Geiman, D.E. and Yang, V.W. (1999) Characterization of the structure and regulation of the murine gene encoding gut-enriched Kruppel-like factor (Kruppel-like factor 4). *Nucleic Acids Res*, 27, 4562-4569.
- Majerus, M.A., Bibollet-Ruche, F., Telliez, J.B., Wasylyk, B. and Bailleul, B. (1992) Serum, AP-1 and Ets-1 stimulate the human ets-1 promoter. *Nucleic Acids Res*, 20, 2699-2703.
- Martinotti, S., Richman, A. and Hayday, A. (1988) Disruption of the putative c-myc auto-regulation mechanism in a human B cell line. *Curr Top Microbiol Immunol*, 141, 264-268.
- Mechta, F.a.Y., M. (1994) In Angel, P.E.a.H., P.A. (ed.), *The Fos and Jun Families of Transcription Factors*. CRC Press, Boca Raton, p. 115.
- Meyer, T.E., Waeber, G., Lin, J., Beckmann, W. and Habener, J.F. (1993) The promoter of the gene encoding 3',5'-cyclic adenosine monophosphate (cAMP) response element binding protein contains cAMP response elements: evidence for positive auto-regulation of gene transcription. *Endocrinology*,

132, 770-780.

- Molina, C.A., Foulkes, N.S., Lalli, E. and Sassone-Corsi, P. (1993) Inducibility and negative auto-regulation of CREM: an alternative promoter directs the expression of ICER, an early response repressor. *Cell*, 75, 875-886.
- Muralidharan, V., Sweet, T., Nadraga, Y., Amini, S. and Khalili, K. (2001) Regulation of Puralpha gene transcription: evidence for auto-regulation of Puralpha promoter. *J Cell Physiol*, 186, 406-413.
- Narimatsu, M., Maeda, H., Itoh, S., Atsumi, T., Ohtani, T., Nishida, K., Itoh, M., Kamimura, D., Park, S.J., Mizuno, K., Miyazaki, J., Hibi, M., Ishihara, K., Nakajima, K. and Hirano, T. (2001) Tissue-specific auto-regulation of the stat3 gene and its role in interleukin-6-induced survival signals in T cells. *Mol Cell Biol*, 21, 6615-6625.
- Neuman, E., Flemington, E.K., Sellers, W.R. and Kaelin, W.G., Jr. (1994) Transcription of the E2F-1 gene is rendered cell cycle dependent by E2F DNA-binding sites within its promoter. *Mol Cell Biol*, 14, 6607-6615.
- Nicolaidis, N.C., Gualdi, R., Casadevall, C., Manzella, L. and Calabretta, B. (1991) Positive auto-regulation of c-myc expression via Myb binding sites in the 5' flanking region of the human c-myc gene. *Mol Cell Biol*, 11, 6166-6176.
- Niehof, M., Kubicka, S., Zender, L., Manns, M.P. and Trautwein, C. (2001) Auto-regulation enables different pathways to control CCAAT/enhancer binding protein beta (C/EBP beta) transcription. *J Mol Biol*, 309, 855-868.
- Nishikawa, K., Kobayashi, M., Masumi, A., Lyons, S.E., Weinstein, B.M., Liu, P.P. and Yamamoto, M. (2003) Self-association of Gata1 enhances transcriptional activity in vivo in zebra fish embryos. *Mol Cell Biol*, 23, 8295-8305.
- Oberkofler, H., Schraml, E., Krempler, F. and Patsch, W. (2003) Potentiation of liver X receptor transcriptional activity by peroxisome-proliferator-activated receptor gamma co-activator 1 alpha. *Biochem J*, 371, 89-96.
- Oguchi, H. and Kimura, S. (1998) Multiple transcripts encoded by the thyroid-specific enhancer-binding protein (T/EBP)/thyroid-specific transcription factor-1 (TTF-1) gene: evidence of auto-regulation. *Endocrinology*, 139, 1999-2006.
- Ohtani-Fujita, N., Fujita, T., Takahashi, R., Robbins, P.D., Dryja, T.P. and Sakai, T. (1994) A silencer element in the retinoblastoma tumor-suppressor gene. *Oncogene*, 9, 1703-1711.
- Oka, T., Komuro, I., Shiojima, I., Hiroi, Y., Mizuno, T., Aikawa, R., Akazawa, H., Yamazaki, T. and Yazaki, Y. (1997) Auto-regulation of human cardiac homeobox gene CSX1: mediation by the enhancer element in the first intron. *Heart Vessels*, Suppl 12, 10-14.
- Oka, T., Rairkar, A. and Chen, J.H. (1991) Structural and functional analysis of the regulatory sequences of the ets-1 gene. *Oncogene*, 6, 2077-2083.
- Okumura-Nakanishi, S., Saito, M., Niwa, H. and Ishikawa, F. (2005) Oct-3/4 and Sox2 regulate Oct-3/4 gene in embryonic stem cells. *J Biol Chem*, 280, 5307-5317.
- Okuno, Y., Huang, G., Rosenbauer, F., Evans, E.K., Radoska, H.S., Iwasaki, H., Akashi, K., Moreau-Gachelin, F., Li, Y., Zhang, P., Gottgens, B. and Tenen, D.G. (2005) Potential auto-regulation of transcription factor PU.1 by an upstream regulatory element. *Mol Cell Biol*, 25, 2832-2845.
- Orkin, S.H. (1995) Hematopoiesis: how does it happen? *Curr Opin Cell Biol*, 7, 870-877.
- Pankratova, E.V., Sytina, E.V., Luchina, N.N. and Krivega, I.V. (2003) The regulation of the Oct-1 gene transcription is mediated by two promoters. *Immunol Lett*, 88, 15-20.
- Saadane, N., Alpert, L. and Chalifour, L.E. (2000) Altered molecular response to adrenoreceptor-induced cardiac hypertrophy in Egr-1-deficient mice. *Am J Physiol Heart Circ Physiol*, 278, H796-805.
- Sadow, P.M., Chassande, O., Koo, E.K., Gauthier, K., Samarut, J., Xu, J., O'Malley, B.W. and Weiss, R.E. (2003) Regulation of expression of thyroid hormone receptor isoforms and coactivators in liver and heart by thyroid hormone. *Mol Cell Endocrinol*, 203, 65-75.
- Saito, H., Yasumoto, K., Takeda, K., Takahashi, K., Fukuzaki, A., Orikasa, S. and Shibahara, S. (2002) Melanocyte-specific microphthalmia-associated transcription factor isoform activates its own gene promoter through physical interaction with lymphoid-enhancing factor 1. *J Biol Chem*, 277, 28787-28794.
- Sassone-Corsi, P., Sisson, J.C. and Verma, I.M. (1988) Transcriptional auto-regulation of the proto-oncogene fos. *Nature*, 334, 314-319.
- Schuettengruber, B., Simboeck, E., Khier, H. and Seiser, C. (2003) Auto-regulation of mouse histone deacetylase 1 expression. *Mol Cell Biol*, 23, 6993-7004.

- Sears, R., Ohtani, K. and Nevins, J.R. (1997) Identification of positively and negatively acting elements regulating expression of the E2F2 gene in response to cell growth signals. *Mol Cell Biol*, 17, 5227-5235.
- Shan, B., Chang, C.Y., Jones, D. and Lee, W.H. (1994) The transcription factor E2F-1 mediates the auto-regulation of RB gene expression. *Mol Cell Biol*, 14, 299-309.
- Sivak, L.E., Tai, K.F., Smith, R.S., Dillon, P.A., Brodeur, G.M. and Carroll, W.L. (1997) Auto-regulation of the human N-myc oncogene is disrupted in amplified but not single-copy neuroblastoma cell lines. *Oncogene*, 15, 1937-1946.
- Smith, J.E., 3rd and Cronmiller, C. (2001) The Drosophila daughterless gene auto-regulates and is controlled by both positive and negative cis regulation. *Development*, 128, 4705-4714.
- Spencer, J.A. and Misra, R.P. (1996) Expression of the serum response factor gene is regulated by serum response factor binding sites. *J Biol Chem*, 271, 16535-16543.
- Sun, H. and Taneja, R. (2000) Stra13 expression is associated with growth arrest and represses transcription through histone deacetylase (HDAC)-dependent and HDAC-independent mechanisms. *Proc Natl Acad Sci U S A*, 97, 4058-4063.
- Tanabe, A., Kumahara, C., Osada, S., Nishihara, T. and Imagawa, M. (2000) Gene expression of CCAAT/enhancer-binding protein delta mediated by auto-regulation is repressed by related gene family proteins. *Biol Pharm Bull*, 23, 1424-1429.
- Tapscott, S.J. and Weintraub, H. (1991) MyoD and the regulation of myogenesis by helix-loop-helix proteins. *J Clin Invest*, 87, 1133-1138.
- Ten, R.M., Paya, C.V., Israel, N., Le Bail, O., Mattei, M.G., Virelizier, J.L., Kourilsky, P. and Israel, A. (1992) The characterization of the promoter of the gene encoding the p50 subunit of NF-kappa B indicates that it participates in its own regulation. *Embo J*, 11, 195-203.
- Thayer, M.J., Tapscott, S.J., Davis, R.L., Wright, W.E., Lassar, A.B. and Weintraub, H. (1989) Positive auto-regulation of the myogenic determination gene MyoD1. *Cell*, 58, 241-248.
- Theill, L.E. and Karin, M. (1993) Transcriptional control of GH expression and anterior pituitary development. *Endocr Rev*, 14, 670-689.
- Timchenko, N., Wilson, D.R., Taylor, L.R., Abdelsayed, S., Wilde, M., Sawadogo, M. and Darlington, G.J. (1995) Auto-regulation of the human C/EBP alpha gene by stimulation of upstream stimulatory factor binding. *Mol Cell Biol*, 15, 1192-1202.
- Tou, L., Quibria, N. and Alexander, J.M. (2003) Transcriptional regulation of the human Runx2/Cbfa1 gene promoter by bone morphogenetic protein-7. *Mol Cell Endocrinol*, 205, 121-129.
- Trieu, M., Ma, A., Eng, S.R., Fedtsova, N. and Turner, E.E. (2003) Direct auto-regulation and gene dosage compensation by POU-domain transcription factor Brn3a. *Development*, 130, 111-121.
- Tsai, S.F., Strauss, E. and Orkin, S.H. (1991) Functional analysis and in vivo footprinting implicate the erythroid transcription factor GATA-1 as a positive regulator of its own promoter. *Genes Dev*, 5, 919-931.
- Ulven, S.M., Dalen, K.T., Gustafsson, J.A. and Nebb, H.I. (2004) Tissue-specific auto-regulation of the LXRalpha gene facilitates induction of apoE in mouse adipose tissue. *J Lipid Res*, 45, 2052-2062.
- Walker, W.H., Fucci, L. and Habener, J.F. (1995) Expression of the gene encoding transcription factor cyclic adenosine 3',5'-monophosphate (cAMP) response element-binding protein (CREB): regulation by follicle-stimulating hormone-induced cAMP signaling in primary rat Sertoli cells. *Endocrinology*, 136, 3534-3545.
- Wang, X., Li, Z., Naganuma, A. and Ye, B.H. (2002) Negative auto-regulation of BCL-6 is bypassed by genetic alterations in diffuse large B cell lymphomas. *Proc Natl Acad Sci U S A*, 99, 15018-15023.
- Xu, F., Li, H. and Jin, T. (1999) Cell type-specific auto-regulation of the Caudal-related homeobox gene Cdx-2/3. *J Biol Chem*, 274, 34310-34316.
- Yamaguchi, Y., Sawada, J., Yamada, M., Handa, H. and Azuma, N. (1997) Auto-regulation of Pax6 transcriptional activation by two distinct DNA-binding subdomains of the paired domain. *Genes Cells*, 2, 255-261.
- Zhou, M. and Ouyang, W. (2003) The function role of GATA-3 in Th1 and Th2 differentiation. *Immunol Res*, 28, 25-37.
- Zhu, L., Xie, E. and Chang, L.S. (1995) Differential roles of two tandem E2F sites in repression of the human p107 promoter by retinoblastoma and p107 proteins. *Mol Cell Biol*, 15, 3552-3562.

**Table S6.** Mammalian transcription factors that do not directly auto-regulate\*\*\*

| <b>Regulator</b> | <b>Symbol</b> | <b>Reference</b>      |
|------------------|---------------|-----------------------|
| USF1             | USF1          | This work             |
| YY1              | YY1           | Yao et al. 1998       |
| SF1              | NR5A1         | Woodson et al. 1997   |
| MR               | NR3C2         | Meyer et al. 1994     |
| LEF1             | LEF1          | Vadlamudi et al. 2005 |
| PAX3             | PAX3          | Borycki et al. 1999   |
| TBX1             | TBX1          | Ataliotis et al. 2005 |

\*\*\* **References**

- Borycki, A. G., Li, J., Jin, F., Emerson, C. P., and Epstein, J. A. (1999). Pax3 functions in cell survival and in pax7 regulation. *Development* 126, 1665-1674.
- Meyer, A. S., and Schmidt, T. J. (1994). In contrast to glucocorticoid receptors, mineralocorticoid receptors are not auto-regulated in rat distal colon epithelia. *Endocrinology* 134, 1163-1172.
- Vadlamudi, U., Espinoza, H. M., Ganga, M., Martin, D. M., Liu, X., Engelhardt, J. F., and Amendt, B. A. (2005). PITX2, beta-catenin and LEF-1 interact to synergistically regulate the LEF-1 promoter. *J Cell Sci* 118, 1129-1137.
- Woodson, K. G., Crawford, P. A., Sadovsky, Y., and Milbrandt, J. (1997). Characterization of the promoter of SF-1, an orphan nuclear receptor required for adrenal and gonadal development. *Mol Endocrinol* 11, 117-126.
- Yao, Y. L., Dupont, B. R., Ghosh, S., Fang, Y., Leach, R. J., and Seto, E. (1998). Cloning, chromosomal localization and promoter analysis of the human transcription factor YY1. *Nucleic Acids Res* 26, 3776-3783.

**Comparison between Rada-Iglesias et al. ENCODE data and Odom et al. promoter data**

Rada-Iglesias et al. *Human Mol. Genetics* (2005) reports CHIP-chip results using the NHGRI-designed ENCODE array design in human hepatomas with HNF4 $\alpha$ , FOXA2, and USF1, all of which are profiled in primary human hepatocytes in this manuscript. Because similar transcription factors were targeted in both studies, we compared the results of these experiments. We note limited experimental overlap, characterized by differences in the tissues, antisera, the genomic regions targeted by each platform, and platform composition (i.e. PCR-product arrays versus 60-mer DNA oligonucleotide-based arrays). Similarities include identical profiled transcription factors and related tissue phenotypes (Table S7).

We identified the collection of bound regions which overlap between these two platforms and compared the data between these two reports (Materials and methods). Of the apolipoprotein cluster described in detail in Rada-Iglesias, we found qualitative agreement between the two datasets. The remaining interactions showed modest correspondence (Table S8). The binding sequences for each transcriptional regulator experiment are shown (Figure S2).

**Table S7.** Tissues, antisera, and array platforms used for CHIP experiments in Rada-Iglesias et al. 2005 and Odom et al. 2006.

|                        | Rada-Iglesias et al. 2005         | Odom et al. 2006                                       |
|------------------------|-----------------------------------|--------------------------------------------------------|
| Tissues                | HepG2 hepatoma                    | Primary human donor hepatocytes                        |
| Platform               | ENCODE 30 MB arrays, PCR products | Agilent 10-array sets, 100 MB, 60-mer oligonucleotides |
| Genome Build           | HG16                              | HG17                                                   |
| HNF4 $\alpha$ antisera | ActiveMotif #39076 (discontinued) | Sc-8987 or sc-6556                                     |
| USF1 antisera          | Sc-229 and/or Sc-8983             | AB/HLH230 (Cemines)                                    |
| HNF3 $\beta$ antisera  | Sc-6554*                          | Gift of R. Costa                                       |

**Table S8.** Binding event overlap between Rada-Iglesias et al. 2005 and Odom et al. 2006.

| Transcriptional regulator | Regions bound on ENCODE arrays present on Agilent arrays | Binding events observed in common |
|---------------------------|----------------------------------------------------------|-----------------------------------|
| USF1                      | 11                                                       | 0 <sup>+</sup>                    |
| HNF4 $\alpha$             | 30                                                       | 12                                |
| FOXA2                     | 17                                                       | 4                                 |

+ Two binding events in Rada-Iglesias showed enrichment in corresponding regions in our data, but were slightly under the binding cutoff used for our data analysis.

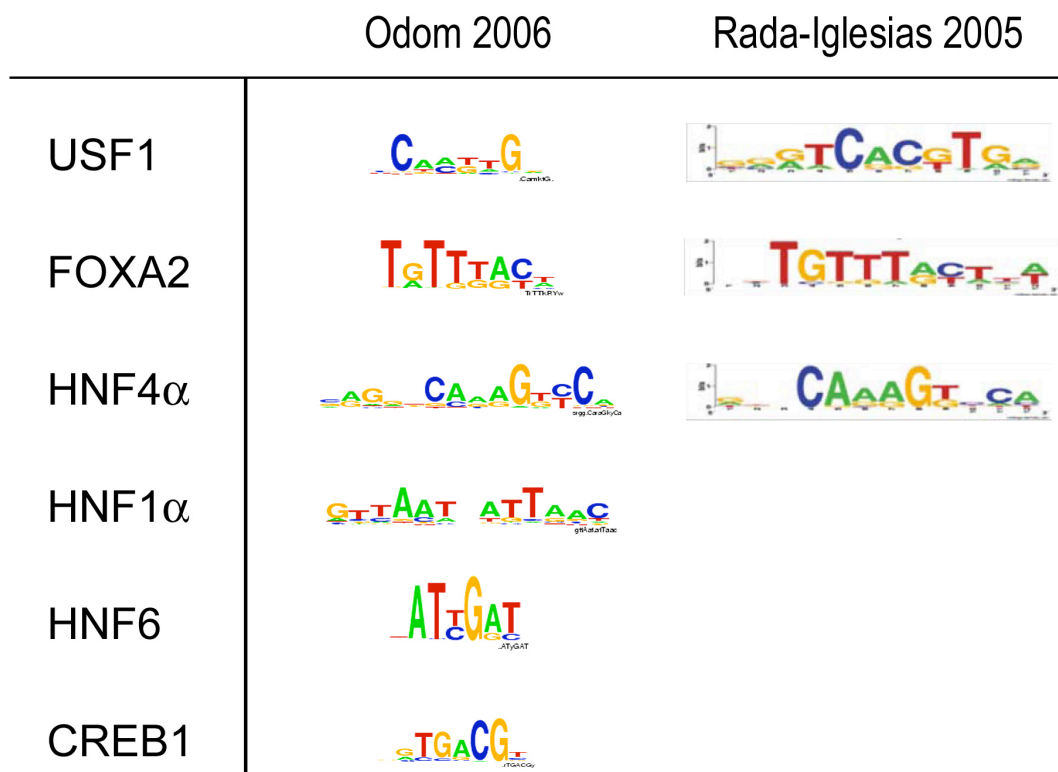

**Figure S2.** Binding sequences determined in Odom et al. 2006 and Rada-Iglesias et al. 2005. To identify motif for a factor, we use the motif discovery method THEME (see Materials and methods).

**Table S9.** Statistical significance of the sequence motifs reported here for six liver master regulators.

| Transcriptional regulator | Cross-validation error | Significance of cross-validation errors (measured in standard deviations) <sup>++</sup> |
|---------------------------|------------------------|-----------------------------------------------------------------------------------------|
| FOXA2                     | 0.36                   | 7.73                                                                                    |
| HNF1α                     | 0.35                   | 6.59                                                                                    |
| HNF4α                     | 0.31                   | 7.49                                                                                    |
| HNF6                      | 0.29                   | 7.63                                                                                    |
| CREB1                     | 0.22                   | 15.42                                                                                   |
| USF1                      | 0.43                   | 2.42                                                                                    |

<sup>++</sup> Results were calculated using THEME (Maclsaac et al. 2006), as described in Materials and Methods. The significance of each motif was determined by comparing the observed cross-validation error (CV error) with the CV errors of motifs derived by applying THEME repeatedly to randomly selected input sequences, as described in Maclsaac et al. 2006. The significance of the CV error is reported as the number of standard deviations below the mean CV error observed in the randomized control calculations. The sequence motif discovered for USF1 is only marginally significant.



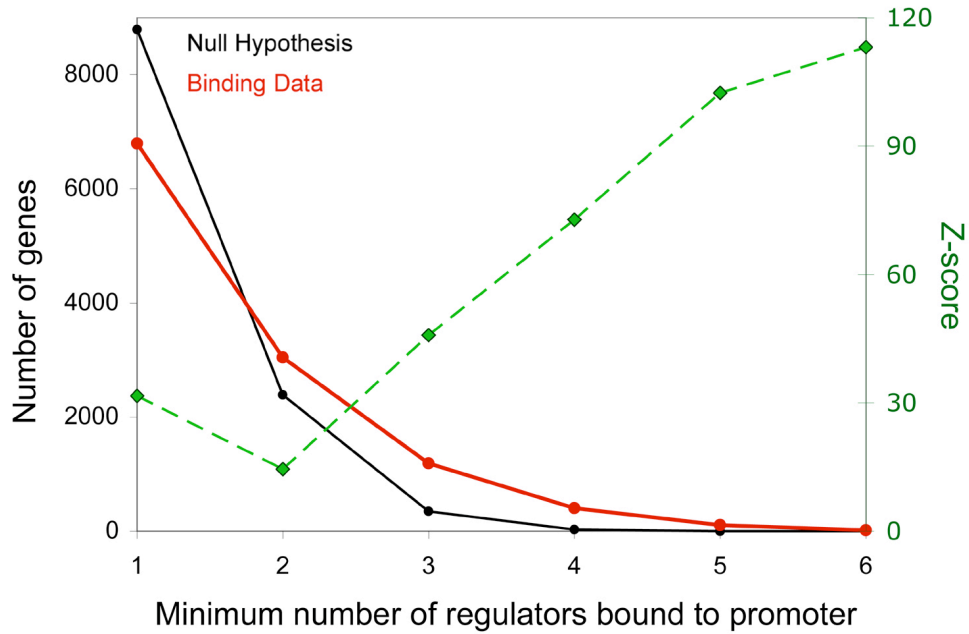

**Figure S3.** Combinatorial occupancy of promoter regions is significantly enriched, using expectations calculated assuming a binomial distribution of binding events. The expected (black) and actual (red) binding events are shown with the z-score of the difference (green).

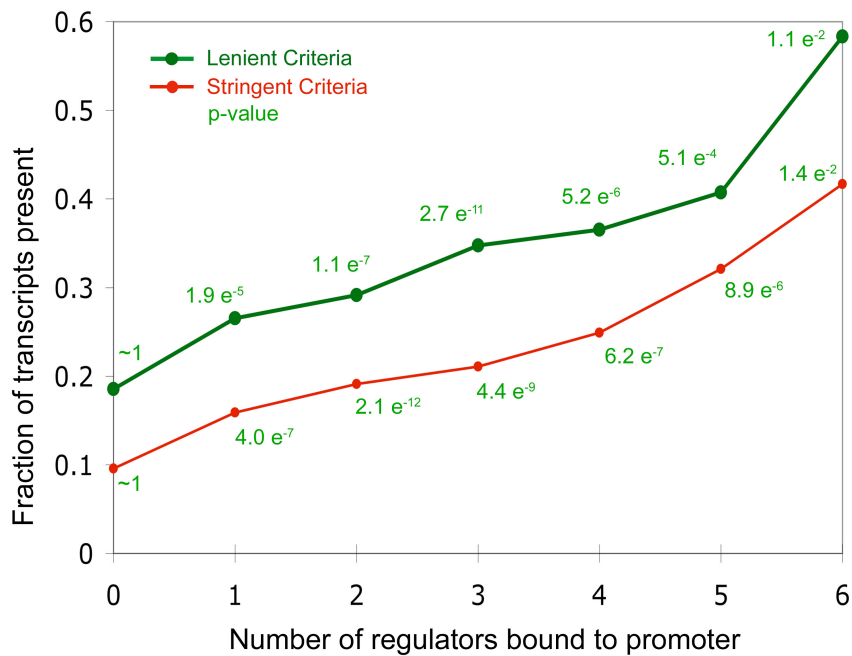

**Figure S4.** Number of bound transcription factors corresponds with gene expression in liver independent of stringency of analysis. The p-values were determined using a hypergeometric calculation, and transcripts present were established by analysis of publicly available compendiums of tissue-specific gene expression using lenient (green) and stringent (red) criteria (see methods below). The p-values for the higher number of transcription factors bound drop due to the decreasing sample size.

## **MATERIALS AND METHODS**

Protocols can also be downloaded from <http://web.wi.mit.edu/young/autoregulation/>

*Human tissues.* Normal human hepatocytes were obtained through the Liver Tissue Procurement and Distribution System, Pittsburgh, Pennsylvania (funded by NIH Contract DK-92310). Cells were chemically cross-linked by the addition of a final concentration of 1% formaldehyde solution for 15 minutes at room temperature. Cells were rinsed twice with PBS or HBSS, frozen in liquid nitrogen, and stored at  $-80^{\circ}\text{C}$  prior to use. The experiments reported here used hepatocyte mixtures created using healthy donor material obtained from multiple individuals, where the donor combinations were selected to maximize diversity of age and gender in liver mix (see supporting website for more information).

| Regulator     | Liver Used  | Slide identifier format               | Liver Used  | Slide identifier format               |
|---------------|-------------|---------------------------------------|-------------|---------------------------------------|
| HNF1 $\alpha$ | Liver Mix 1 | 050828_HNF1A_hLiver_1_HP01a_slidecode | Liver Mix 2 | 050905_HNF1A_hLiver_2_HP01a_slidecode |
| HNF4 $\alpha$ | Liver Mix 1 | 050826_HNF4A_hLiver_1_HP01a_slidecode | Liver Mix 2 | 050830_HNF4A_hLiver_2_HP01a_slidecode |
| FOXA2         | Liver Mix 5 | 050920_FOXA2_hLiver_1_HP01a_slidecode | Liver Mix 2 | 050924_FOXA2_hLiver_2_HP01a_slidecode |
| HNF6          | Liver Mix 1 | 050607_HNF6_hLiver_1_HP01a_slidecode  | Liver Mix 2 | 050710_HNF6_hLiver_3_HP01a_slidecode  |
| USF1          | Liver Mix 3 | 050922_USF1_hLiver_1_HP01a_slidecode  |             |                                       |
| CREB1         | Liver Mix 3 | 050926_pCREB_hLiver_1_HP01a_slidecode |             |                                       |

*Chromatin immunoprecipitation protocol.* Protocols describing materials and methods are available at <http://web.wi.mit.edu/young/autoregulation/> and have been previously reported (Odom et al. 2004, Boyer et al. 2005). In short, frozen cells were resuspended, and lysed. Sonication conditions were determined for each cell batch to maximize chromatin sizes between 300-700 bp, and sonications were performed using a Misonix Sonicator 3000, typically at power 7 for ten x 30 second pulses (90 second pause between pulses) at  $4^{\circ}\text{C}$  in an ice-water bath. The lysate was clarified by centrifugation at 14,000 rpm at  $4^{\circ}\text{C}$ , and incubated 8 hours at  $4^{\circ}\text{C}$  with 100  $\mu\text{l}$  of Dynal Protein G or Protein A magnetic beads and 10  $\mu\text{g}$  of the appropriate antibody (Table S1). The purified DNA was blunted and ligated to unidirectional linker and amplified using a two-stage PCR protocol. Amplified DNA was labeled and purified using Invitrogen Bioprime random primer labeling kits. Labeled DNA was combined (5 – 6  $\mu\text{g}$  each of immunoenriched Cy5 labeled and input Cy3 labeled DNA) and hybridized with tumbling to arrays in Agilent hybridization chambers for 40 hours at  $40^{\circ}\text{C}$ . Arrays were then washed and scanned per the manufacturer's instructions.

*Microarray design.* To more accurately identify the transcriptional regulatory circuitry in human hepatocytes, we have investigated genome-wide occupancy of transcriptional regulators at higher resolution than prior experimental designs used to explore liver-specific gene regulation. Previous designs have used self-printed DNA microarrays with one or two DNA elements to capture signals from each promoter region, covering up to 3 kb at approximately 3,000 transcription start sites, or 1 kb at approximately 13,000 transcription start sites (Friedman et al. 2004, Phuc Le et al. 2005, Rubins et al. 2005, Odom et al. 2004, Zhang et al. 2005). These arrays represented substantially less than whole genome coverage, and were either biased towards promoter regions identified as being present in cDNA libraries isolated from specific tissues (Friedman et al. 2004, Phuc Le et al. 2005, Rubins et al. 2005) or they represented promoters of earlier and less complete genomic annotations derived from NCBI databases (Odom et al. 2004, Zhang et al.

2005). A recent report (Rada-Iglesias et al. 2005) also uses self-print PCR-based ENCODE arrays ([www.genome.gov](http://www.genome.gov)) designed to capture a cross-section of genome features including the apolipoprotein cluster, combined with ChIPs against many of the same transcription factors we report. ENCODE arrays are however not principally gene-centric and have limited overlap with the data reported here (see above).

To overcome these limitations, we used commercial DNA microarrays with custom designs that represent a comprehensive collection of regulatory regions that control most predicted and essentially all known genes (Boyer et al. 2005). The results we obtain with this platform provide a more complete picture of transcription factor occupancy in human hepatocytes by key master regulators, and produce the first high-resolution maps of transcriptional regulation by a core set of master regulators in primary human hepatocytes.

A comprehensive collection of well-characterized transcription start sites was determined by identifying all transcription start sites described in five different databases: RefSeq, Ensembl, MGC, VEGA ([www.vega.sanger.ac.uk](http://www.vega.sanger.ac.uk)) and Broad ([www.broad.mit.edu](http://www.broad.mit.edu)). The first three are publicly available databases for gene annotation, the VEGA and Broad data sets are manually annotated databases. We identified all the transcription start sites present in any two of these five databases from the May 2004 build of the human genome.

We then designed DNA microarrays that contain 60-mer oligonucleotide probes covering the region from  $-8$  kb to  $+2$  kb relative to the transcript start sites for these 17,917 annotated human genes (Boyer et al. 2005). Although transcription factors are known to regulate genes from distances greater than 8 kb, most known binding sites for human transcription factors occur within 8 kb of the transcription start site. The sites occupied by transcription factors afforded peaks of ChIP-enriched DNA that span neighboring probes (examples Figure S1). These promoter regions averaged one 60-mer for each 250 bases of sequence, and allowed identification of in vivo binding sites to within tens of bases of position in the genome.

*Identification of bound regions.* To determine bound regions on the arrays, we developed an algorithm to incorporate information from neighboring probes (described in detail in Boyer et al. 2005). For each 60-mer, we calculated the average probability score of the 60-mer and its two immediate neighbors. If a feature was flagged as abnormal during scanning, we assigned it a neutral contribution to the average probability score. Similarly, if the nearest adjacent feature was beyond 1000 bp, we assigned a neutral contribution. The distance threshold of 1000 bp was determined based on the maximum size of labeled DNA fragments hybridized to the array using the shear distribution of the DNA amplified from the chromatin immunoprecipitation. The maximum fragment size ranged from 500 to 700 bp, depending on the particular experiment.

This set of averaged values gave us a distribution that was subsequently used to calculate p-values of average probe sets. The probe set p-value was determined for each factor based on a number of criteria, including capture of known positives and statistical measurements of the distribution of noise among control probes in the array data.

*Comparison of gene expression and location data.* Gene expression datasets used here were from the Novartis Gene Expression Atlas (<http://wombat.gnf.org/>) (Su et al. 2004). Expression probes were mapped to genes in the binding data using the knownToU133 and knownToGNF1 tables from UCSC (<http://genome.ucsc.edu/>). Careful cross-mapping of the genomic location of the complete set of probes in the ten-array set and the genes present on the expression arrays (both as described above) afforded a set of 13,243 genes where there was location and expression data that corresponded to the identical genes.

For the stringent analysis displayed in Figure 1B, we considered a gene present if and only if the expression is called as present (that is, 'P') in both replicates of human liver from the Novartis datasets. For genes with more than one expression probe, we further maximized stringency by requiring that all probes be uniformly present to call a gene expressed. Implementing these criteria identifies 1752 genes expressed in human liver.

Using this list of expressed genes, we then examined multi-input patterns (e.g. exactly 3 factors bound, etc.) to determine the fraction of genes within each multi-input motif expressed. A positive trend exists between the number of factors bound and the fraction of genes expressed, with p-values calculated using a hypergeometric distribution.

To confirm that this trend was not a result of the stringency of our criteria for defining a gene as expressed, we repeated the analysis using different stringencies. For comparison, Figure 1B compares our most lenient and strictest criteria for expression. The strict case is described above. For the lenient case, using a single present call among the probes that represent a gene to call the presence of a transcript, we identify 3149 genes as expressed. Combining these genes with the location data affords Figure S3, which incorporates the data displayed in Figure 1B for comparison. p-values for the expression-location comparisons for the higher number of genes bound (e.g. 6-factor multi-input motifs) drop due to the small sample sizes.

*Identification of transcriptional regulatory motifs.* We used algorithms previously reported (Lee et al. 2002) to determine the basic regulatory motifs described here. Briefly (partially paraphrased from Odom et al 2004), two data matrixes were created. The matrix consists of binary entries  $D_{ij}$ , where we indicate a binding event of regulator  $j$  to intergenic region  $i$  as a 1; otherwise, as 0 is placed in this location. The regulator matrix  $R$  is a subset of  $D$ , containing only the rows corresponding to the intergenic region assigned to each regulator, in the same order as the columns of regulators.

**Auto-regulatory motifs** were identified as a non-zero entry on the diagonal of  $R$ .

**Feedforward loops** were identified as a column of  $R$  with non-zero entries, which correspond to regulators bound. For each master regulator / secondary regulator pair, we then found all rows in the larger set of genes,  $D$ , bound by both regulators. **Multi-component loops** were identified as a column of  $R$  where the regulators to which it binds then binds the original regulator; this represents a multi-component loop of two. Repeat out to find larger loops.

**Single input motifs** were identified as the collection of intergenic regions bound by only one regulator. **Multi-input motifs** were identified as the collections of intergenic regions bound by more than one regulator. Larger sized multi-input modules that employ more than 2 regulators could in principle be deconvoluted to combinations of smaller multi-input motifs. Notably, multi-input motifs are assembled from the largest size down, and smaller ones exclude genes previously identified as bound by more factors. For example, a gene like PCK1 is considered to be the target of a 6-input motif, and would not show up in smaller ones, though in principle any two regulators when taken independent of the complete dataset would form a 2-input motif at PCK1.

*Identification and analysis of binding sequence motifs.* Briefly, for each transcriptional regulator, we removed half the probes called as bound (determined as described above) that had the highest (worst) p-values (Lee et al. 2002, Boyer et al. 2005). We then sorted the remaining probes using alternative p-values that were calculated by incorporating data from adjacent probes, as described in Boyer et al. 2005. This ranking was used to identify the 100 best-bound probes, which were used as input sequences to the THEME program (MacIsaac et al. 2006) to determine a sequence

motif for each transcriptional regulator. Probe sequences stretched from the position of the probe 800 base pairs in each direction or half the distance to the neighboring probe, whichever was smaller.

THEME was employed to search for sequence motifs consistent with the family binding profiles corresponding to the PFAM family of each factor. We used with 3-fold cross-validation, and repeated the calculations three times with different random partitions of the data. We selected the family binding profile with the lowest median cross-validation error (CV error), and averaged the three motifs derived from this profile to use as our final motif for each regulator. To determine the statistical significance of the discovered sequence motifs, we compared the CV error of the reported motif with the CV errors of motifs derived by applying THEME to 50 sets of randomly selected input sequences using the same family binding profile and parameters, as described in MacIsaac et al. 2006.

We scanned all the bound probes with the reported motif to identify matches. To obtain the threshold for defining a match to the motifs, we re-ran the motifs through THEME using the same high-quality input sequences as before, but without the motif discovery step (the “-norefine” flag). This calculation determines the optimal threshold for classifying bound and not-bound regions using a support vector machine. The six supplemental files downloadable from the journal website are in THEME-output format and provide the coordinates of each match relative to the probe location.

*Comparison of location data from Rada-Iglesias et al. 2005 to this work.* The wiggle file reported in the supplemental materials of Rada-Iglesias et. al. 2005 was obtained and used as provided, with the recommended cutoff of 1.5 to identify binding events. We assigned each binding event to the closest gene within the hg16 genome build. We then determined how many of these binding events were contained within the region arrayed on our Agilent promoter arrays (described above), assuming localized equivalence between the hg16 and hg17 genome build (See Table S8: Regions bound on ENCODE arrays present on Agilent arrays). Finally, we determined how many of these genes were bound in our processed data using the standard error model and previously described cutoffs.

*Data availability.* Complete raw data from these experiments have been deposited into the public database ArrayExpress with accession number: **E-WMIT-9**

### **Materials and Methods References**

- Friedman, J. R., Larris, B., Le, P. P., Peiris, T. H., Arsenlis, A., Schug, J., Tobias, J. W., Kaestner, K. H., and Greenbaum, L. E. (2004). Orthogonal analysis of C/EBPbeta targets in vivo during liver proliferation. *Proc Natl Acad Sci U S A* 101, 12986-12991.
- Odom, D. T., Zizlsperger, N., Gordon, D. B., Bell, G. W., Rinaldi, N. J., Murray, H. L., Volkert, T. L., Schreiber, J., Rolfe, P. A., Gifford, D. K., et al. (2004). Control of pancreas and liver gene expression by HNF transcription factors. *Science* 303, 1378-1381.
- Boyer, L. A., Lee, T. I., Cole, M. F., Johnstone, S. E., Levine, S. S., Zucker, J. P., Guenther, M. G., Kumar, R. M., Murray, H. L., Jenner, R. G., et al. (2005). Core transcriptional regulatory circuitry in human embryonic stem cells. *Cell* 122, 947-956.
- Phuc Le, P., Friedman, J. R., Schug, J., Brestelli, J. E., Parker, J. B., Bochkis, I. M., and Kaestner, K. H. (2005). Glucocorticoid receptor-dependent gene regulatory networks. *PLoS Genet* 1, e16.
- Rada-Iglesias, A., Wallerman, O., Koch, C., Ameer, A., Enroth, S., Clelland, G., Wester, K., Wilcox, S., Dovey, O.M., Ellis, P.D., Wraight, V.L., James, K., Andrews, R., Langford, C., Dhimi, P., Carter, N., Vetrie, D., Ponten, F., Komorowski, J., Dunham, I. and Wadelius, C. (2005) Binding sites for metabolic

- disease related transcription factors inferred at base pair resolution by chromatin immunoprecipitation and genomic microarrays. *Hum Mol Genet*, 14, 3435-3447.
- Rubins, N. E., Friedman, J. R., Le, P. P., Zhang, L., Brestelli, J., and Kaestner, K. H. (2005). Transcriptional networks in the liver: hepatocyte nuclear factor 6 function is largely independent of *Foxa2*. *Mol Cell Biol* 25, 7069-7077.
- Su, A.I., Wiltshire, T., Batalov, S., Lapp, H., Ching, K.A., Block, D., Zhang, J., Soden, R., Hayakawa, M., Kreiman, G., Cooke, M.P., Walker, J.R. and Hogenesch, J.B. (2004) A gene atlas of the mouse and human protein-encoding transcriptomes. *Proc Natl Acad Sci U S A*, 101, 6062-6067.
- Zhang, X., Odom, D. T., Koo, S. H., Conkright, M. D., Canettieri, G., Best, J., Chen, H., Jenner, R., Herbolsheimer, E., Jacobsen, E., et al. (2005). Genome-wide analysis of cAMP-response element binding protein occupancy, phosphorylation, and target gene activation in human tissues. *Proc Natl Acad Sci U S A* 102, 4459-4464.
